# Supplementary material for: Modeling pulsativity in the hypothalamic–pituitary–adrenal hormonal axis
Source: PubMed Central journal article supplement (PMC9120490; doi:10.1038/s41598-022-12513-w), 2022-05-19
Supplement: 41598_2022_12513_MOESM1_ESM.pdf [file 41598_2022_12513_MOESM1_ESM.pdf]

# Supplementary material for the manuscript: Modeling pulsativity in the hypothalamic-pituitary-adrenal hormonal axis

Alexander N. Churilov and John G. Milton

## Mathematical model

Consider a system of differential equations with delay and impulses:

$$\dot{C} = -k_c C + k_{ca} A(t - \tau), \quad (1)$$

$$\dot{A} = -k_a A + (A_0 + k_{ah} H) F_a(C) F_v(V), \quad (2)$$

$$\dot{V} = -k_v V + (V_0 + k_{vh} H) F_a(C). \quad (3)$$

The coordinates  $C(t)$ ,  $A(t)$  are continuous in time, and the potential function  $V(t)$  is left-continuous and may have impulses (jumps). The pulsation times  $t_n$  are defined from the recursion

$$t_0 = 0, \quad t_{n+1} = \min\{t : t > t_n, \quad V(t) = \Delta\}, \quad (4)$$

where  $\Delta$  is a given firing threshold. After the firing the function  $V(t)$  resets to zero:

$$V(t_n^+) = 0. \quad (5)$$

Here  $V(t_n^+)$  is the right-sided limit of  $V(t)$  at the point  $t_n$ .

Assume that  $F_a(\cdot)$  and  $F_v(\cdot)$  are nonlinear functions,

$$F_a(C) = F_0 + \frac{1}{1 + C/h_c}, \quad F_v(V) = e^{-k_s V} \quad \text{or} \quad F_v(V) = V e^{-k_s V}. \quad (6)$$

The parameters  $k_a, k_c, k_v, k_{ah}, k_{ca}, k_{vh}, A_0, V_0, \tau, k_s, h_c, F_0$  are all positive.

The function  $H(t)$  describes a synergetic input from the hypothalamic nuclei. In our simulations it is taken periodic or quasiperiodic.

System (1)–(5) is functional-differential with a discrete delay and jumps. Let  $t_0 = 0$  be the initial time and  $V(t_0^+) = 0$ . For any initial data  $C(t_0), A(t) = \varphi(t), t \in [t_0 - \tau, t_0]$ , where  $\varphi(t)$  is a continuous initial function, there exists a unique solution of system (1)–(5).

## Simple properties of the model

Equations (1)–(3) can be rewritten as

$$\dot{C}(t) = -k_c C(t) + f_c(t), \quad (7)$$

$$\dot{A}(t) = -k_a A(t) + f_a(t), \quad (8)$$

$$\dot{V}(t) = -k_v V(t) + I(t), \quad (9)$$

where

$$f_c(t) = k_{ca} A(t - \tau), \quad (10)$$

$$f_a(t) = (A_0 + k_{ah} H(t)) F_a(C(t)) F_v(V(t)), \quad (11)$$

$$I(t) = (V_0 + k_{vh} H(t)) F_a(C(t)). \quad (12)$$

**Proposition 1** System (1)–(3) is positive, i.e. its solutions have non-negative components for any non-negative initial data. Namely, let the input signal  $H(t) \geq 0$  for  $t \geq t_0$ ,  $A(t) \geq 0$  for  $t_0 - \tau \leq t \leq t_0$  and  $C(t_0) \geq 0$ . Then  $A(t) \geq 0$ ,  $C(t) \geq 0$ ,  $V(t) \geq 0$  for all  $t \geq t_0$ .

**Proof** Obviously  $I(t) \geq 0$  and hence  $0 \leq V(t) \leq \Delta$  for all  $t \geq t_0$ . From (7), (8) we obtain

$$C(t) = e^{-k_c(t-t_0)}C(t_0) + \int_{t_0}^t e^{-k_c(t-s)}f_c(s)ds, \quad (13)$$

$$A(t) = e^{-k_a(t-t_0)}A(t_0) + \int_{t_0}^t e^{-k_a(t-s)}f_a(s)ds, \quad t \geq t_0. \quad (14)$$

Then the statement of the proposition evidently follows.  $\square$

Further we suppose that the conditions of Proposition 1 are fulfilled, because only positive decisions have biological meaning. Let  $0 \leq H^- \leq H(t) \leq H^+$  for  $t \geq t_0$ , where  $H^-, H^+$  are some numbers. Introduce a number

$$F_v^+ = \begin{cases} 1, & F_v(V) = e^{-k_s V}, \\ (k_s e)^{-1}, & F_v(V) = V e^{-k_s V}. \end{cases}$$

Evidently  $F_v(V) \leq F_v^+$  for all  $V$ .

**Proposition 2** Define

$$A^+ = (A_0 + k_{ah}H^+)(F_0 + 1)F_v^+/k_a, \quad C^+ = A^+k_{ca}/k_c.$$

Then  $A(t)$  and  $C(t)$  are bounded for  $t \geq t_0$ , and

$$\limsup_{t \rightarrow +\infty} A(t) \leq A^+, \quad \limsup_{t \rightarrow +\infty} C(t) \leq C^+.$$

**Proof** The proof follows from (13), (14).  $\square$

Obviously  $I^- \leq I(t) \leq I^+$  for all  $t \geq t_0$ , where

$$I^- = (V_0 + k_{vh}H^-)F_0, \quad I^+ = (V_0 + k_{vh}H^+)(F_0 + 1).$$

**Proposition 3** Let

$$I^- > \Delta k_v. \quad (15)$$

Define  $T_n = t_{n+1} - t_n$ ,  $n \geq 0$ . Then for any solution of (9), (4), (5) and all  $n \geq 0$  we have

$$-\frac{1}{k_v} \ln \left( 1 - \frac{\Delta k_v}{I^+} \right) \leq T_n \leq -\frac{1}{k_v} \ln \left( 1 - \frac{\Delta k_v}{I^-} \right). \quad (16)$$

**Proof** The proof follows immediately from the integral representation

$$V(t) = \int_0^{t-t_n} e^{-k_v(t-t_n-s)}I(s+t_n)ds, \quad t_n \leq t \leq t_{n+1} \quad (17)$$

and from the equality  $V(t_{n+1}) = \Delta$ .  $\square$

In the special case  $k_v \rightarrow +0$  (a perfect integrator) (15) is satisfied and (16) takes the form

$$\Delta/I^+ \leq T_n \leq \Delta/I^-. \quad (18)$$

If  $I^- < \Delta k_v$ , then the threshold  $\Delta$  is never reached and the function  $V(t)$  has no jumps.
